# Supplementary material for: Different amplitudes of temperature fluctuation induce distinct transcriptomic and metabolomic responses in the dung beetle Phanaeus vindex
Source: Oxford University Press journal article supplement (doi:10.1242/jeb.233239), 2020-01-01
Supplement: jeb233239supp.pdf [file jeb233239supp.pdf]

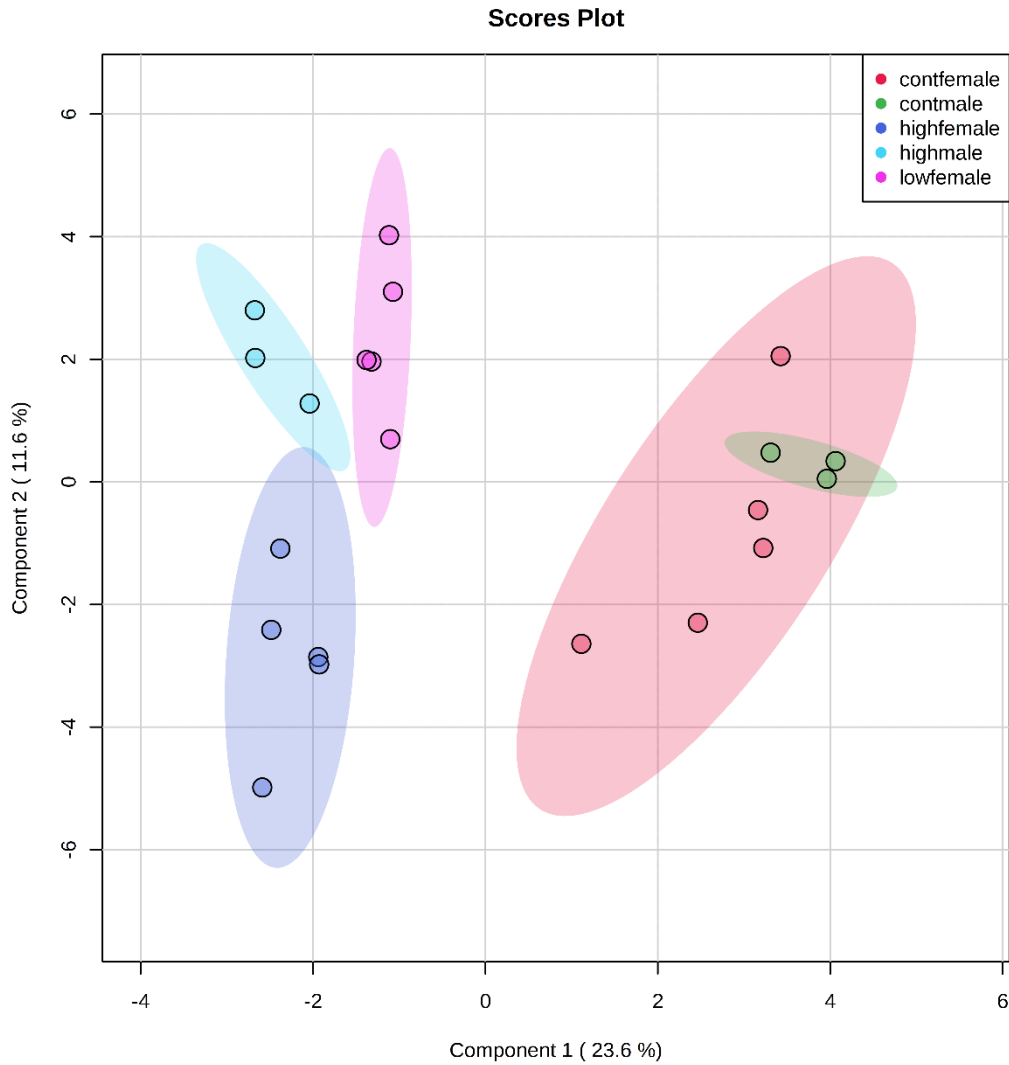

**Figure S1.** Sparse partial least squares discriminant analysis plot of metabolites in female and male *Phanaeus vindex* dung beetles following acclimation to six days of control (20 °C), low (20 ± 5 °C), and high (20 ± 12 °C) amplitude temperature fluctuation. Note that males were exposed to control and high fluctuation treatments only.

**Table S1.** Putative metabolites differentially expressed following acclimation to low amplitude temperature fluctuations ( $20 \pm 5$  °C) in the dung beetle *Phanaeus vindex*. Only the top 5 metabolites significantly up and downregulated are displayed. Fold changes are displayed relative to control kept at constant temperature (20 °C).

|                      | <b>Putative metabolite</b> | <b>Mass<br/>(m/z)</b> | <b>Retention<br/>time<br/>(minutes)</b> | <b>Log<sub>2</sub> fold<br/>change</b> | <b>Map</b>   |
|----------------------|----------------------------|-----------------------|-----------------------------------------|----------------------------------------|--------------|
| <b>Upregulated</b>   | Not assigned               | 148.05                | 7.06                                    | 0.95                                   | Not assigned |
|                      | Not assigned               | 148.01                | 9.96                                    | 0.46                                   | Not assigned |
|                      | Not assigned               | 224.14                | 9.56                                    | 0.45                                   | Not assigned |
|                      | Not assigned               | 222.13                | 9.37                                    | 0.36                                   | Not assigned |
|                      | Not assigned               | 282.14                | 8.72                                    | 0.36                                   | Not assigned |
| <b>Downregulated</b> | Not assigned               | 754.14                | 6.61                                    | -1.70                                  | Not assigned |
|                      | Cyclic ADP-ribose          | 541.06                | 1.35                                    | -1.11                                  | Not assigned |

**Table S2.** Putative metabolites differentially expressed following acclimation to high amplitude temperature fluctuations ( $20 \pm 12$  °C) in the dung beetle *Phanaeus vindex*. Only the top 5 metabolites significantly up and downregulated are displayed. Fold changes are displayed relative to control kept at constant temperature (20 °C).

|                      | Putative metabolite                              | Mass (m/z) | Retention time (minutes) | Log <sub>2</sub> fold change | Map                             |
|----------------------|--------------------------------------------------|------------|--------------------------|------------------------------|---------------------------------|
| <b>Upregulated</b>   | PC (16:0)                                        | 577.38     | 13.28                    | 3.02                         | Lipids:<br>Glycerophospholipids |
|                      | PA(17:1(9Z)/<br>22:6(4Z,7Z,10Z,13Z,1<br>6Z,19Z)) | 732.47     | 13.69                    | 2.97                         | Lipids:<br>Glycerophospholipids |
|                      | PG(40:7)                                         | 820.53     | 13.63                    | 2.89                         | Lipids:<br>Glycerophospholipids |
|                      | PG (6:0/8:0)                                     | 776.50     | 13.74                    | 2.85                         | Lipids:<br>Glycerophospholipids |
|                      | (9Z)-Tetradecenoic acid                          | 226.19     | 13.38                    | 2.67                         | Lipids: Fatty Acyls             |
| <b>Downregulated</b> | Not assigned                                     | 200.23     | 4.88                     | -0.62                        | Not assigned                    |
|                      | Not assigned                                     | 127.14     | 4.87                     | -0.53                        | Not assigned                    |
|                      | FA (18:0)                                        | 341.29     | 12.28                    | -0.38                        | Lipids: Fatty Acyls             |
|                      | Not assigned                                     | 101.12     | 20.89                    | -0.20                        | Not assigned                    |

**Table S3.** Putative metabolites differentially expressed following acclimation to both high and low amplitude temperature fluctuations in the dung beetle *Phanaeus vindex*. Only the top 5 metabolites significantly up and downregulated are displayed, “contraregulated” indicates metabolites that are upregulated in one acclimation group and downregulated in the other. Fold changes are displayed relative to control kept at constant temperature.

|                      | Putative metabolite                                  | Map                          | Mass (m/z) | Retention time (minutes) | Log <sub>2</sub> fold change after high amplitude fluctuations                 | Log <sub>2</sub> fold change after low amplitude fluctuations |
|----------------------|------------------------------------------------------|------------------------------|------------|--------------------------|--------------------------------------------------------------------------------|---------------------------------------------------------------|
| <b>Upregulated</b>   | CL(18:2(9Z,12Z)/18:2(9Z,12Z)/18:2(9Z,12Z)/18:1(11Z)) | Not assigned                 | 725.49     | 14.87                    | 1.16<br>(not detected in control, relative expression to low amplitude group). |                                                               |
|                      | LysoPE(0:0/22:2(13Z,16Z))                            | Lipids: Glycerophospholipids | 533.35     | 13.32                    | 3.32                                                                           | 1.75                                                          |
|                      | Not assigned                                         | Not assigned                 | 614.37     | 13.49                    | 2.06                                                                           | 1.03                                                          |
|                      | Not assigned                                         | Not assigned                 | 784.50     | 12.51                    | 2.02                                                                           | 1.37                                                          |
|                      | 3-O-(Galb)-(25R)-12-oxo-5alpha-spirostan-3beta-ol    | Lipids: Sterol Lipids        | 608.39     | 12.56                    | 1.97                                                                           | 1.16                                                          |
| <b>Downregulated</b> | His-Leu-Leu-Met                                      | Peptide(tetra-)              | 256.14     | 22.90                    | -0.94                                                                          | -0.71                                                         |

|                        |                           |                              |        |       |       |       |
|------------------------|---------------------------|------------------------------|--------|-------|-------|-------|
|                        | PE(22:1(13Z)/P-18:1(11Z)) | Lipids: Glycerophospholipids | 391.81 | 22.37 | -0.10 | -0.24 |
| <b>Contraregulated</b> | Not assigned              | Not assigned                 | 754.23 | 6.65  | 0.76  | -1.32 |
|                        | Not assigned              | Not assigned                 | 393.05 | 0.70  | -0.31 | 0.30  |
|                        | Not assigned              | Not assigned                 | 266.17 | 12.37 | -0.29 | 0.24  |
|                        | Not assigned              | Not assigned                 | 127.14 | 20.96 | -0.28 | 0.13  |
|                        | Not assigned              | Not assigned                 | 192.15 | 9.36  | -0.15 | 0.12  |

---

**Table S4.** Significantly differentially expressed transcripts following acclimation to low amplitude temperature fluctuations in the dung beetle *Phanaeus vindex*. GO terms are listed only for molecular function. Only the top 5 up and down-regulated transcripts are given.

|                      | Description                                                | Log <sub>2</sub> Fold Change | GO Names                                                                                     |
|----------------------|------------------------------------------------------------|------------------------------|----------------------------------------------------------------------------------------------|
| <b>Upregulated</b>   | agrin-like isoform X4                                      | 5.70                         | calcium ion binding; collagen binding; extracellular matrix binding                          |
|                      | titin isoform X5                                           | 5.16                         | None assigned                                                                                |
|                      | ubiquitin carboxyl-terminal hydrolase 31 isoform X2        | 4.99                         | hydrolase activity; hiol-dependent ubiquitinyl hydrolase activity                            |
|                      | ATP-binding cassette sub-family G member 1-like isoform X2 | 4.92                         | ATP binding; ATPase activity                                                                 |
|                      | transcription factor E2F5                                  | 4.90                         | DNA binding; DNA-binding transcription factor activity                                       |
| <b>Downregulated</b> | receptor-type tyrosine-phosphatase F-like                  | -7.48                        | protein tyrosine phosphatase activity; phosphatase activity                                  |
|                      | uncharacterized protein LOC111427918                       | -6.34                        | None assigned                                                                                |
|                      | acetyl- carboxylase                                        | -5.90                        | acetyl-CoA carboxylase activity; biotin carboxylase activity; ATP binding; metal ion binding |

|                                                      |       |                                       |
|------------------------------------------------------|-------|---------------------------------------|
| receptor-type tyrosine-phosphatase F-like isoform X1 | -5.58 | protein tyrosine phosphatase activity |
| receptor-type tyrosine-phosphatase U isoform X1      | -5.55 | None assigned                         |

---

**Table S5.** Significantly differentially expressed transcripts following acclimation to high amplitude temperature fluctuations in the dung beetle *Phanaeus vindex*. GO terms are listed only for molecular function. Only the top 5 up and down-regulated transcripts are given.

|                      | Description                                    | Log <sub>2</sub> Fold Change | GO Names                                                                                     |
|----------------------|------------------------------------------------|------------------------------|----------------------------------------------------------------------------------------------|
| <b>Upregulated</b>   | cysteine-rich venom 6-like                     | 8.27                         | None assigned                                                                                |
|                      | isopentenyl diphosphate synthase               | 7.62                         | None assigned                                                                                |
|                      | cystine knot toxin                             | 6.94                         | insulin-like growth factor binding                                                           |
|                      | retinol-binding pinta-like                     | 6.71                         | transporter activity                                                                         |
|                      | farnesyl pyrophosphate synthase-like           | 6.66                         | None assigned                                                                                |
| <b>Downregulated</b> | juvenile hormone acid O-methyltransferase-like | -5.15                        | None assigned                                                                                |
|                      | lipase member I-like                           | -5.12                        | carboxylic ester hydrolase activity                                                          |
|                      | von Willebrand factor-like                     | -4.37                        | acetyl-CoA carboxylase activity; biotin carboxylase activity; ATP binding; metal ion binding |



|                                |       |                                                                                              |
|--------------------------------|-------|----------------------------------------------------------------------------------------------|
| von Willebrand factor-like     | -4.12 | None assigned                                                                                |
| acetyl- carboxylase isoform X3 | -4.00 | acetyl-CoA carboxylase activity; biotin carboxylase activity; ATP binding; metal ion binding |

---

**Table S6.** Significantly differentially expressed transcripts following acclimation to both high and low amplitude temperature fluctuations in the dung beetle *Phanaeus vindex*. GO terms are listed only for molecular function. Only the top 5 up and down-regulated transcripts are given.

|                      | Description                                                | Log <sub>2</sub> Fold Change<br>After Low<br>Amplitude | Log <sub>2</sub> Fold Change<br>After High<br>Amplitude | GO Names                                |
|----------------------|------------------------------------------------------------|--------------------------------------------------------|---------------------------------------------------------|-----------------------------------------|
| <b>Upregulated</b>   | kelch 26<br>amino acid transporter                         | 6.49                                                   | 6.50                                                    | protein binding                         |
|                      | AVT1A isoform X2                                           | 5.55                                                   | 6.29                                                    | None assigned                           |
|                      | ankyrin repeat domain-<br>containing 2-like                | 5.08                                                   | 6.07                                                    | protein binding                         |
|                      | nucleic-acid-binding<br>from mobile element<br>jockey-like | 3.72                                                   | 6.06                                                    | None assigned                           |
|                      | homeobox 5-like<br>isoform X2                              | 6.03                                                   | 6.03                                                    | None assigned                           |
| <b>Downregulated</b> | probable chitinase 10                                      | -4.80                                                  | -4.59                                                   | chitin binding                          |
|                      | cysteine-rich venom 6-<br>like                             | -3.45                                                  | -3.99                                                   | None assigned                           |
|                      | CREG1 isoform X2                                           | -5.15                                                  | -3.88                                                   | FMN binding; oxidoreductase<br>activity |
|                      | fatty acid synthase-like                                   | -3.71                                                  | -3.16                                                   | None assigned                           |

serine threonine-  
kinase

endoribonuclease IRE1

-4.00

-2.93

kinase activity

---
